# Supplementary material for: High seroprevalence of SARS-CoV-2 in Burkina-Faso, Ghana and Madagascar in 2021: a population-based study
Source: Springer Nature journal article supplement (doi:10.1186/s12889-022-13918-y), 2022-09-05

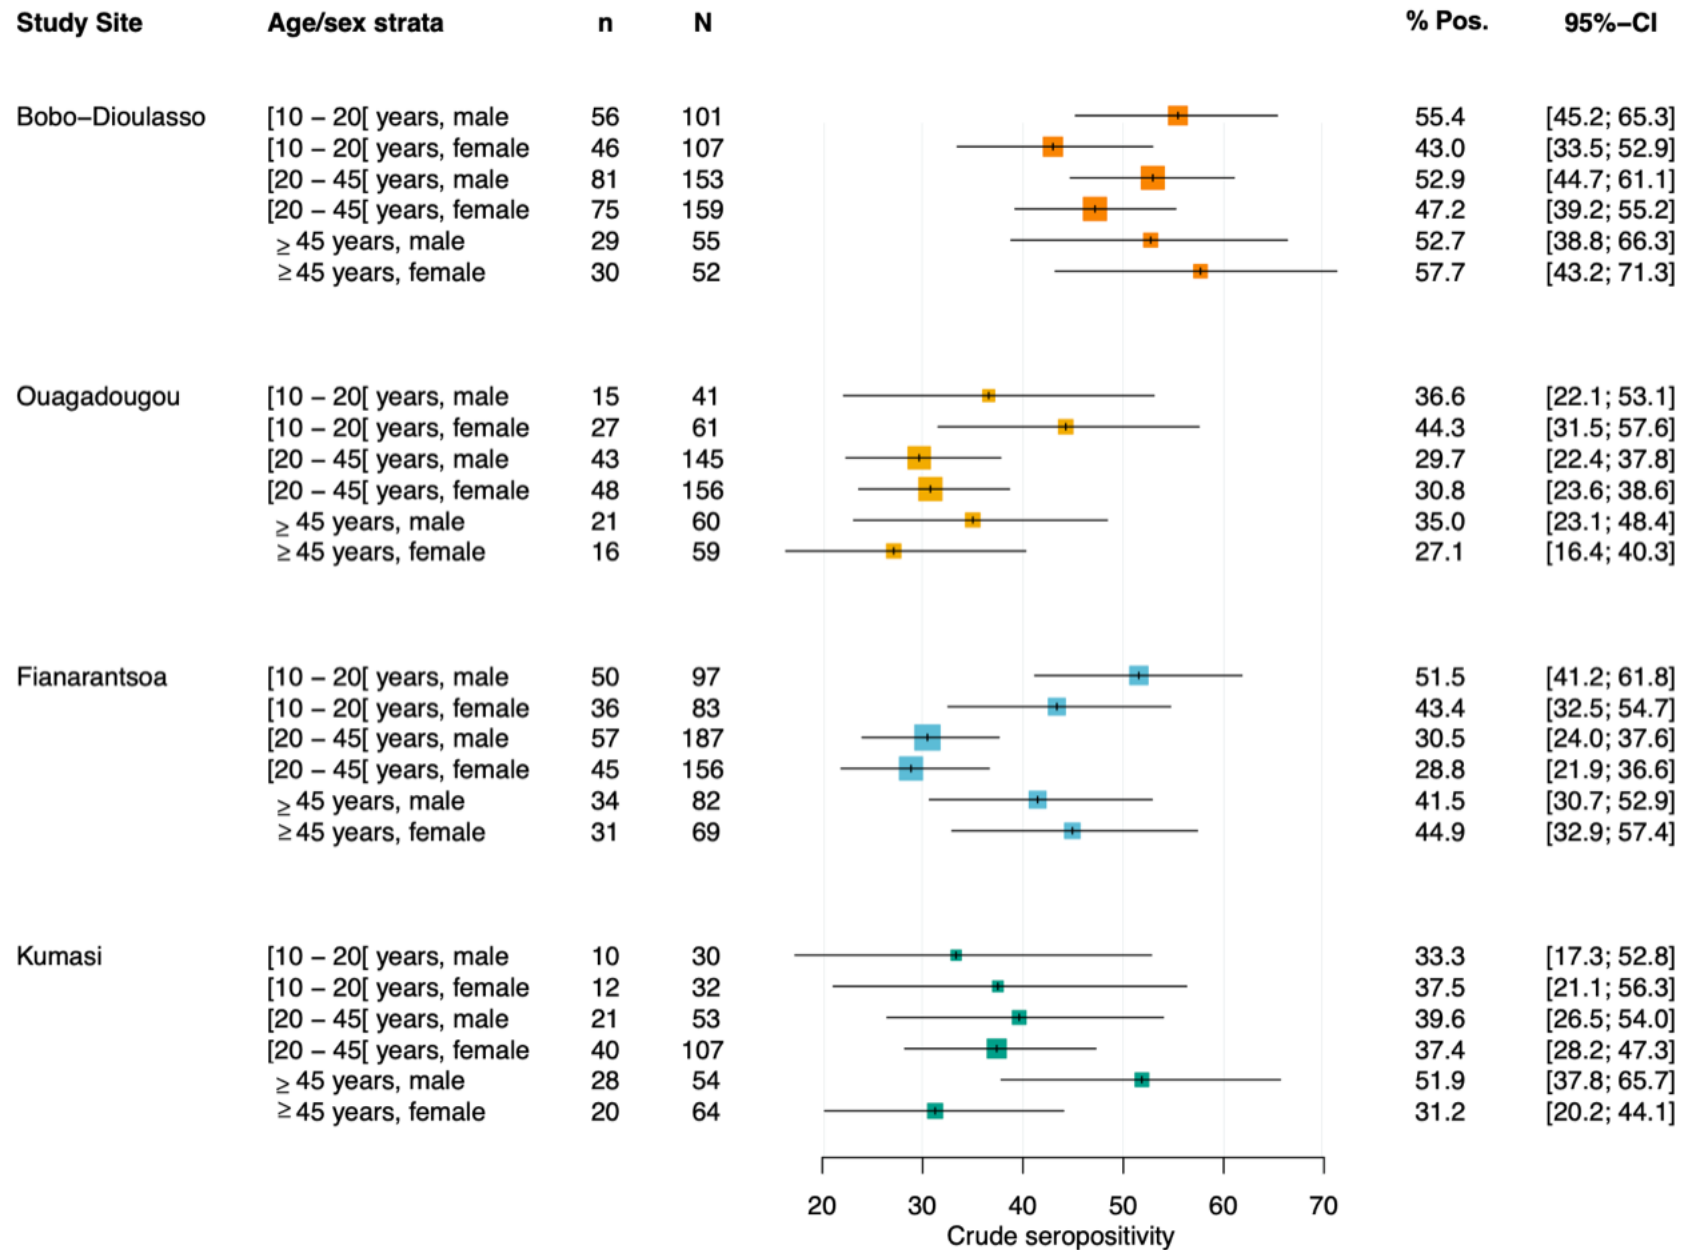

Supplement: MOESM1 [file 23454886]
