# Supplementary material for: High seroprevalence of SARS-CoV-2 in Burkina-Faso, Ghana and Madagascar in 2021: a population-based study
Source: Springer Nature journal article supplement (doi:10.1186/s12889-022-13918-y), 2022-09-05
Supplement: MOESM3 [file 23454886]

## Appendix XX. Statistical model

The model estimates prevalence  $p$ , taking into account specificity and sensitivity of the test and the uncertainty around them:

$$\begin{aligned}
 y &\sim \text{binomial}(n, p_{\text{sample}}) \\
 p_{\text{sample}} &= p * se + (1-p)(1-sp) \\
 y_{\text{sp}} &\sim \text{binomial}(n_{\text{sp}}, sp) \\
 y_{\text{se}} &\sim \text{binomial}(n_{\text{se}}, se)
 \end{aligned}$$

where  $p_{\text{sample}}$  is the probability of a positive result,  $y$  is the number of positives observed,  $n$  is the sample size and  $se$  and  $sp$  are the sensitivity and specificity of the test. Prior information on specificity and sensitivity was taken from the test developer's studies (Table 1). These results were included by adding a hierarchical structure to the model of sensitivity and specificity. Following Gelman and Carpenter, we let the parameter vary according to a hierarchical model where, for any sensitivity study  $j$  and specificity study  $k$ , the sensitivity  $sp_j$  and specificity  $sp_k$  are drawn from a normal distribution on the logistic scale:

$$\begin{aligned}
 \text{logit}(se_{kj}) &\sim \text{normal}(\mu_{se}, \sigma_{se}) \\
 \text{logit}(sp_j) &\sim \text{normal}(\mu_{sp}, \sigma_{sp})
 \end{aligned}$$

where the hyperparameters  $\mu_{sp}$ ,  $\sigma_{sp}$ ,  $\mu_{se}$ , and  $\sigma_{se}$  can be estimated from the data. We fit the model to our data assigning a uniform(0,1) prior to  $p$ ,  $\mu_{sp}$  and  $\mu_{se}$  and weak normal<sup>+</sup>(0,1) prior to  $\sigma_{se}$  and  $\sigma_{sp}$ . The full model is a multilevel regression hierarchical model with post-stratification (MRP). Although the data collected was largely representative of the population, MRP allowed us to do minor adjustments to the estimates using census data. The model is based on the above, replacing  $p$  for  $p_i (i=1 \text{ to } n)$ , the result of a logistic regression that models the probability of being positive on age group, subregion and gender:

$$\begin{aligned}
 p_i &= \text{logit}^{-1}(b_1 + b_2 * \text{male} + a^{\text{age}}_{\text{age}[i]} + a^{\text{subregion}}_{\text{subregion}[i]}) \\
 p_{\text{sample}[i]} &= p_i * se + (1-p_i) * (1-sp) \\
 y_i &\sim \text{bernoulli}(p_{\text{sample}[i]})
 \end{aligned}$$

where  $\text{male}$  is a variable with the value 1 for male and 0 for female,  $\text{age}[i]$  and  $\text{subregion}[i]$  are index variables that correspond to individual  $i$ ,  $b_1$  and  $b_2$  are logistic regression coefficients and  $a_{\text{age}}$  and  $a_{\text{subregion}}$  are vectors of varying intercepts:

$$a_{\text{age}} \sim \text{normal}(0, \sigma_{\text{age}})$$

$$a_{\text{subregion}} \sim \text{normal}(0, \sigma_{\text{subregion}})$$

**Table 1:** Sensitivity and specificity of SARS-CoV-2 IgG ELISAs.

| Sample                                  | Months post-onset | Gold standard N | Kit agreement | Details                            | Origin                                    |
|-----------------------------------------|-------------------|-----------------|---------------|------------------------------------|-------------------------------------------|
| <b>Specificity (negative agreement)</b> |                   |                 |               |                                    |                                           |
| 1                                       | n.a.              | 145             | 145           | 1:2 dilution, cut-off 0.40, serum  | pre-Covid Ghana, 2014/2015, children      |
| 2                                       | n.a.              | 131             | 131           | 1:2 dilution, cut-off 0.40, serum  | pre-Covid Ghana, 1999, teens/adults       |
| 3                                       | n.a.              | 167             | 167           | 1:2 dilution, cut-off 0.40, plasma | pre-Covid Ghana, 1999, teens/adults       |
| 4                                       | n.a.              | 93              | 93            | concentrated, cut-off 0.36, plasma | pre-Covid Ghana, 1999, teens/adults       |
| 5                                       | n.a.              | 93              | 93            | concentrated, cut-off 0.38         | pre-Covid Burkina, 2003/2006/2007, adults |
| <b>Sensitivity (positive agreement)</b> |                   |                 |               |                                    |                                           |
| 1                                       | <1                | 19              | 17            | 1:2 dilution, cut-off 0.400, serum | PCR positive Germany                      |
| 2                                       | 1-2               | 21              | 20            | 1:2 dilution, cut-off 0.401, serum | PCR positive Germany                      |
| 3                                       | 2-5               | 34              | 31            | 1:2 dilution, cut-off 0.402, serum | PCR positive Germany                      |

Abbreviations: n.a., not applicable; N, sample size.

## REFERENCES

Gelman A., Carpenter B. Bayesian analysis of tests with unknown specificity and sensitivity. *J R Stat Soc Ser C Appl Stat.* 2020; 69: 1269-1283
